# Supplementary material for: Construction of MoO2@MoS2heterostructuresin situon carbon cloth for the hydrogen evolution reaction
Source: Royal Society of Chemistry journal article supplement (doi:10.1039/d1nj04245a), 2021-01-01
Supplement: d1nj04245a1.pdf [file d1nj04245a1.pdf]

## Supporting Information

### **Construction of MoO<sub>2</sub>@MoS<sub>2</sub> heterostructures in situ on carbon cloth for hydrogen evolution reaction**

Jingyang Tian, †<sup>a</sup> Chundi Yang, †<sup>a</sup> Zhirui Liu,<sup>a</sup> Funan Li,<sup>a</sup> Xiao He,<sup>a</sup> Wei Chen,<sup>\*b</sup> Nan  
Nan Xia,<sup>\*c</sup> and Chong Lin,<sup>\*a</sup>

<sup>a</sup> Jiangxi Province Key Laboratory of Polymer Micro/Nano Manufacturing and  
Devices, School of Chemistry, Biology and Materials Science, East China University  
of Technology, Nanchang, 330013, China

<sup>b</sup> College of Light-Textile Engineering and Art, Anhui Agriculture University, Hefei,  
230036, China

<sup>c</sup> State Key Laboratory of Biobased Material and Green Papermaking, Key Laboratory  
of Pulp & Paper Science and Technology of Shandong Province/Ministry of Education,  
Qilu University of Technology (Shandong Academy of Sciences), Jinan, 250353, China

\*Corresponding author: [lake688123@163.com](mailto:lake688123@163.com) (W. Chen); [xianan00001@126.com](mailto:xianan00001@126.com) (N.  
Xia) (N. Xia); [clin2008@163.com](mailto:clin2008@163.com) (C. Lin)

† Implies equal contribution.

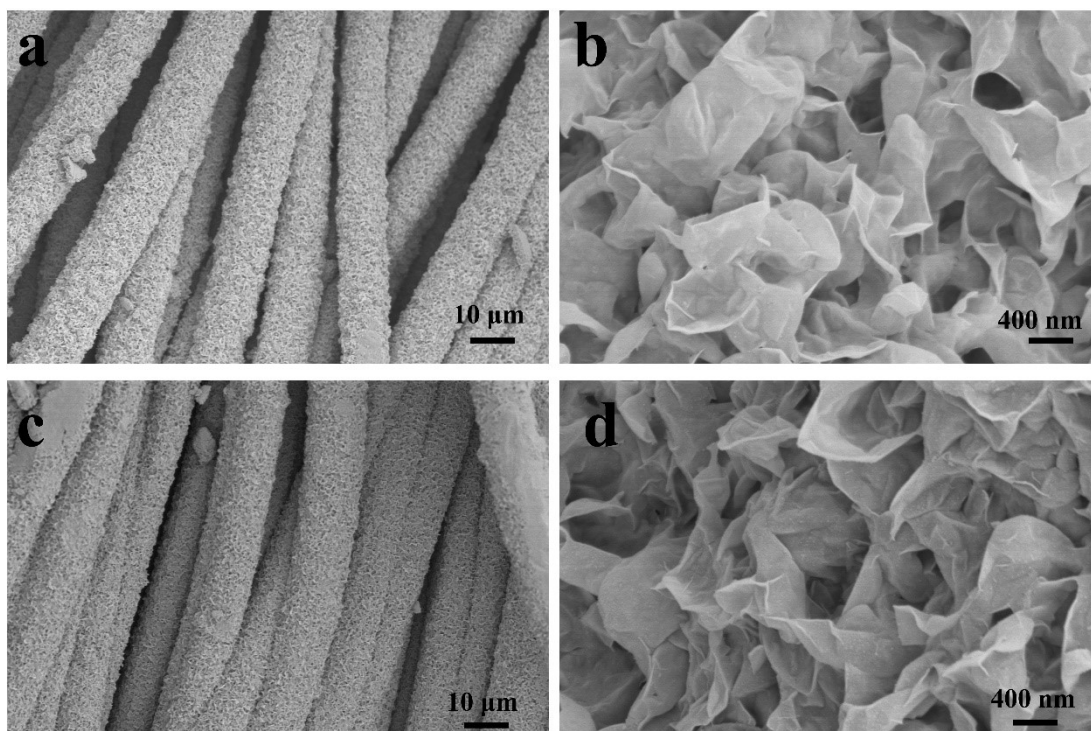

Figure S1. SEM images of (a, b)  $\text{MoO}_2@MoS_2/CC-1$ , (c, d)  $\text{MoO}_2@MoS_2/CC-3$ .

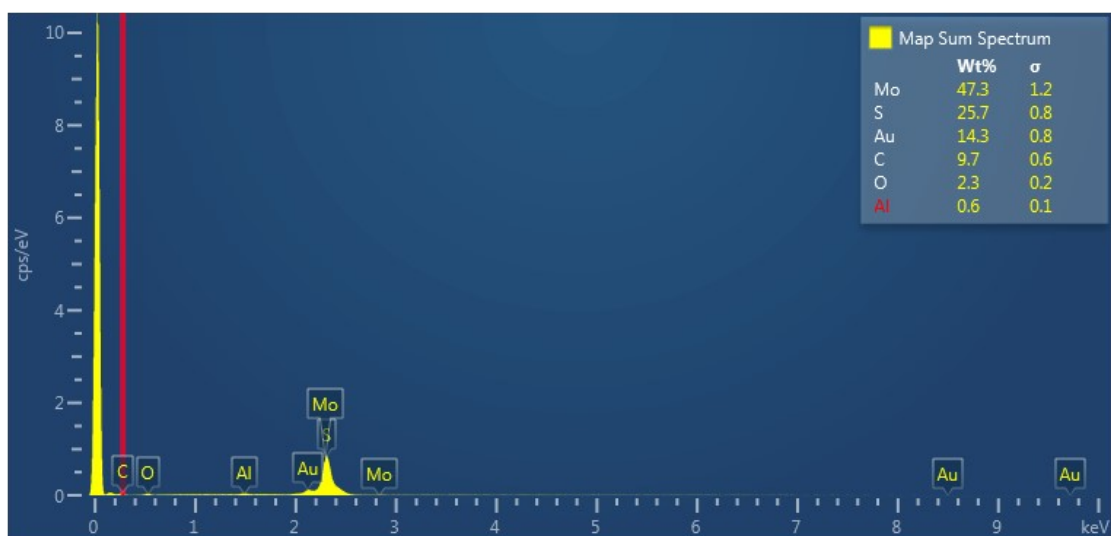

Figure S2. EDS of the  $\text{MoO}_2@MoS_2/CC-2$ .

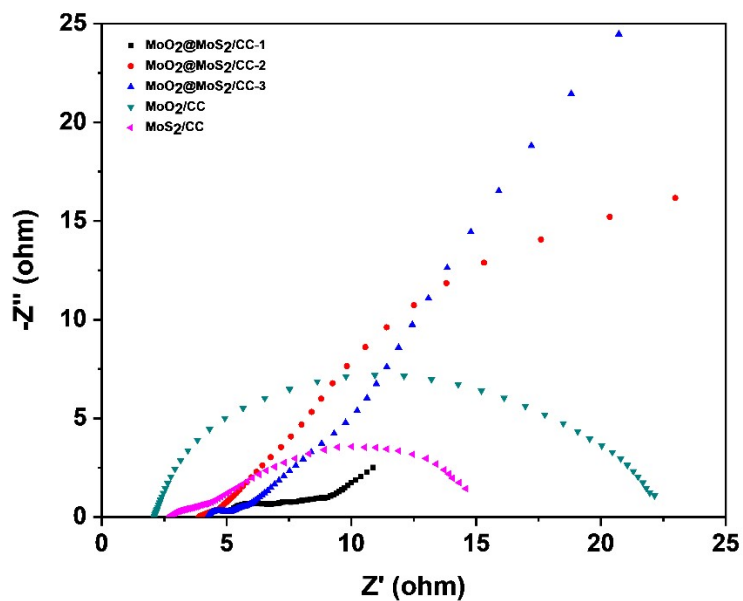

Figure S3. Nyquist plots of the catalysts vs. RHE.

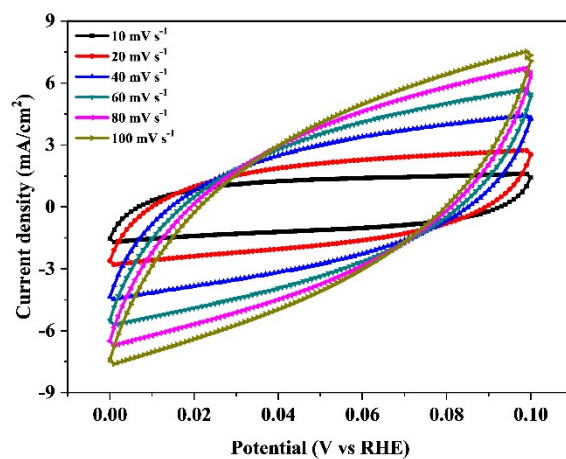

Figure S4. CV curves of  $\text{MoO}_2@MoS_2/CC-1$  at different scan rates.

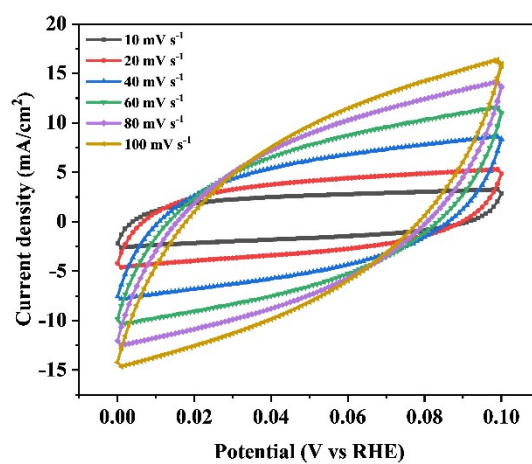

Figure S5. CV curves of  $\text{MoO}_2@MoS_2/CC-2$  at different scan rates.

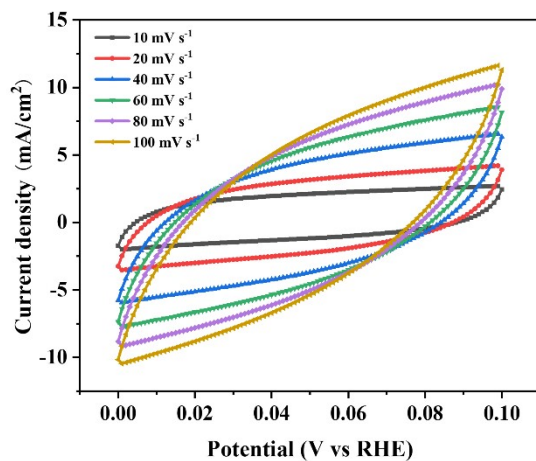

Figure S6. CV curves of MoO<sub>2</sub>@MoS<sub>2</sub>/CC-3 at different scan rates.

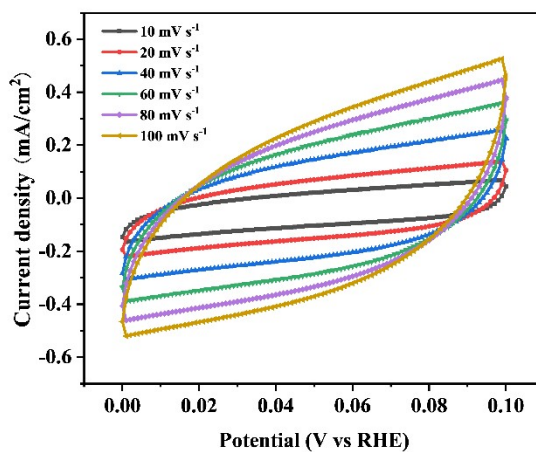

Figure S7. CV curves of MoO<sub>2</sub>/CC at different scan rates.

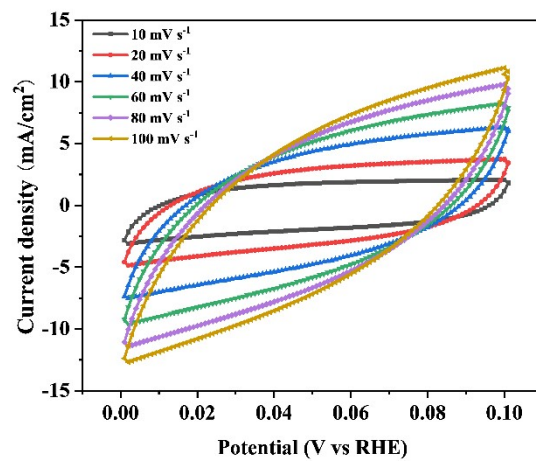

Figure S8. CV curves of MoS<sub>2</sub>/CC at different scan rates.

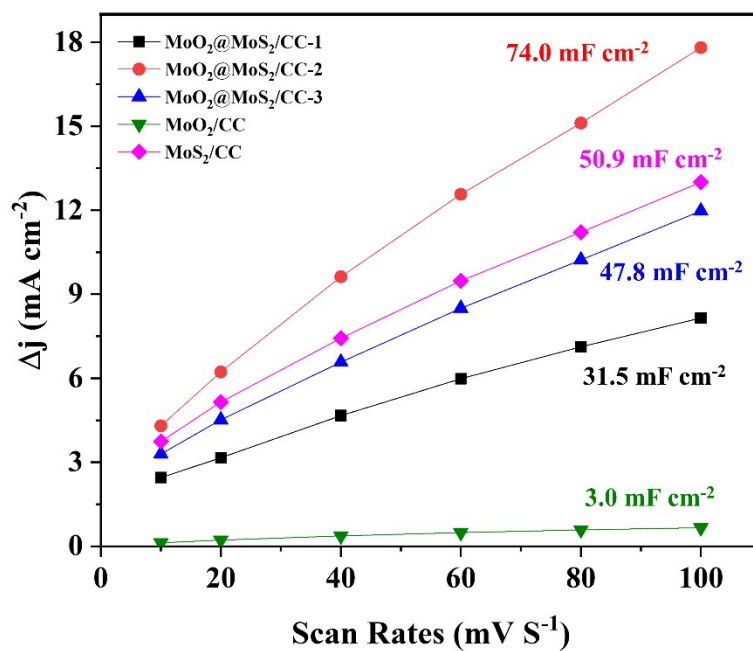

Figure S9.  $C_{dl}$  fitted by the different currents vs. scan rates.

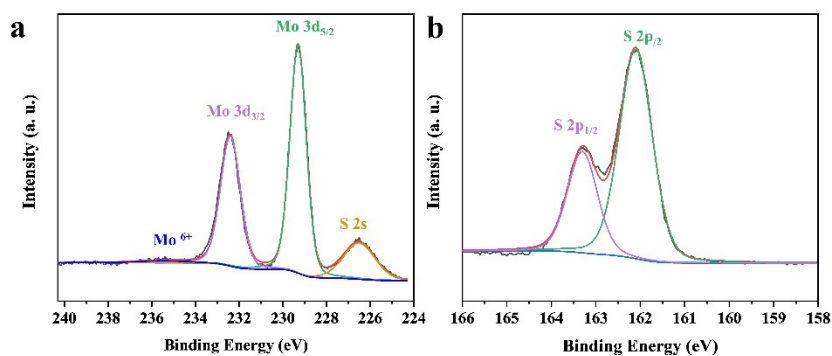

Figure S10. XPS spectra of (a) Mo 3d and (b) S 2p in MoO<sub>2</sub>@MoS<sub>2</sub>/CC-2 after stability test.

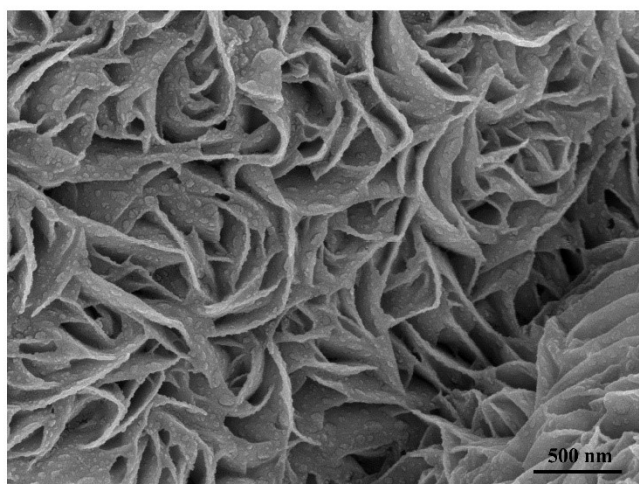

Figure S11. SEM image of MoO<sub>2</sub>@MoS<sub>2</sub>/CC-2 after stability test.
